# Supplementary material for: Dissecting Japan's Dengue Outbreak in 2014
Source: PubMed Central journal article supplement (PMC4751952; doi:10.4269/ajtmh.15-0468), 2016-02-03
Supplement: SD6.pdf [file SD6.pdf]

SUPPLEMENTAL TABLE 1  
GenBank identifiers corresponding to Figure 1

| Strain                              | GenBank ID   |
|-------------------------------------|--------------|
| DENV-1/SG/S413/2004                 | GI:158343463 |
| DENV-1/SG/05K3301DK1/2005           | GI:158851745 |
| DENV-1/SG/05K2402DK1/2005           | GI:158851729 |
| DENV-1/SG/06K2236DK1/2006           | GI:158851829 |
| DENV-1/SG/06K2290DK1/2006           | GI:158851831 |
| DENV-1/VN/D1.Hanoi.1844.13/2008     | GI:558854699 |
| DENV-1/VN/0811fTw/2008              | GI:385718235 |
| DENV-1/VN/D1.HaNoi1.1844.13/2008    | GI:558854767 |
| DENV-1/VN/Den068-HN/2008            | GI:330339276 |
| DENV-1/SG/S012/2005                 | GI:158343457 |
| DENV-1/SG/05K3318DK1/2005           | GI:158851747 |
| DENV-1/SG/05K4632DK1/2005           | GI:158851825 |
| DENV-1/SG/05K4142DK1/2005           | GI:158851783 |
| DENV-1/CN/GZ557/2005                | GI:409187395 |
| DENV-1/SG/T3352/2004                | GI:158343499 |
| DENV-1/SG/S418/2005                 | GI:158343441 |
| DENV-1/SG/S494/2004                 | GI:158343471 |
| DENV-1/CN/LD90-ZS2004/2004          | GI:381413870 |
| DENV-1/SG/T3179/2004                | GI:158343491 |
| DENV-1/SG/S464/2004                 | GI:158343479 |
| DENV-1/SG/S567/2004                 | GI:158343459 |
| DENV-1/SG/05K4139DK1/2005           | GI:158851779 |
| DENV-1/SG/05K4173DK1/2005           | GI:190889633 |
| DENV-1/SG/05K2928DK1/2005           | GI:158851739 |
| DENV-1/SG/05K4154DK1/2005           | GI:158851789 |
| DENV-1/ID/Bali 2010a/2010           | GI:396085274 |
| DENV-1/CN/GD-D13202(Guangzhou)/2013 | GI:636528351 |
| DENV-1/JP/Hu/Saitama/NIID100/2014   | GI:686207807 |
| DENV-1/RO/599/2013                  | GI:584458393 |
| DENV-1/ID/1001aTw/2010              | GI:385718333 |
| DENV-1/SG/SG(EHI)DET3132208/2008    | GI:294986481 |
| DENV-1/SG/SG(EHI)DED80208/2008      | GI:294986425 |
| DENV-1/ID/SBY82/2010                | GI:353742412 |
| DENV-1/ID/SBY36/2010                | GI:353742390 |
| DENV-1/SG/SG(EHI)D1/0279Y09/2009    | GI:363499448 |
| DENV-1/SG/SG(EHI)D1/48084Y10/2010   | GI:363499472 |
